# Supplementary material for: Unique functions for Notch4 in murine embryonic lymphangiogenesis
Source: bioRxiv or medRxiv preprint supplement (doi:10.1101/2021.02.19.431982), 2021-09-29
Supplement: Supplementary file [file media-1.pdf]

**Supplemental Files:**

**Article Title:** *Unique functions for Notch4 in murine embryonic lymphangiogenesis*

**Journal Name:** *Angiogenesis*

**Authors and Affiliations:** Ajit Muley<sup>1\*</sup>, Minji Kim Uh<sup>1,2\*</sup>, Jennifer M. James<sup>3</sup>, Aino Murtomaki<sup>1,4,5</sup>, Joseph D. McCarron<sup>1</sup>, Chris Kitajewski<sup>1</sup>, Maria Gnarra<sup>1</sup>, Gloria Riitano<sup>1,6</sup>, Yoh-suke Mukoyama<sup>3</sup>, Jan Kitajewski<sup>7</sup>, Carrie J. Shawber<sup>1,8</sup>

<sup>1</sup>Department of Obstetrics and Gynecology, Columbia University Medical Center, New York, NY 10032, USA.

<sup>2</sup>Department of Pharmacology, Columbia University Medical Center, New York, NY 10032, USA.

<sup>3</sup>Laboratory of Stem Cell and Neuro-Vascular Biology, Cell and Developmental Biology Center, National Heart, Lung, and Blood Institute, National Institutes of Health, Bethesda, MD 20892, USA.

<sup>4</sup>Wihuri Research Institute, Biomedicum Helsinki, Haartmaninkatu, Helsinki, 8,00290 Finland

<sup>5</sup>Translational Cancer Medicine Program, Faculty of Medicine and Helsinki Institute of Life Science, University of Helsinki, Helsinki, , FI-00014, Finland

<sup>6</sup>Departments of Molecular Medicine and Experimental Medicine, Sapienza University, Rome, 00185, Italy.

<sup>7</sup>Department of Physiology and Biophysics, University of Illinois Chicago, Chicago, IL 60612, USA.

<sup>8</sup>Department of Surgery, Columbia University Medical Center, New York, NY 10032, USA.

**Corresponding Author:**

Carrie J. Shawber, PhD

[cjs2002@cumc.columbia.edu](mailto:cjs2002@cumc.columbia.edu)

## Supplemental Tables

**Table S1. Quantitative RT-PCR primers**

| Gene           | Upper Primer                         | Lower Primer                            |
|----------------|--------------------------------------|-----------------------------------------|
| <i>β-actin</i> | 5' CGA GGC CCA GAG CAA GAG AG 3'     | 5' CTC GTA GAT GGG CAC AGT GTG 3'       |
| <i>Dll4</i>    | 5' CGG GTC ATC TGC AGT GAC AAC 3'    | 5' AGT TGA GAT CTT GGT CAC AAA ACA G 3' |
| <i>Hes1</i>    | 5' CCC AAC GCA GTG TCA CCT TC 3'     | 5' TAC AAA GGC GCA ATC CAA TAT G 3'     |
| <i>Hey1</i>    | 5' ACG AGA ATG GAA ACT TGA GTT C 3'  | 5' AAC TCC GAT AGT CCA TAG CAA G 3'     |
| <i>Hey2</i>    | 5' ATG AGC ATA GGA TTC CGA GAG TG 3' | 5' GGC AGG AGG CAC TTC TGA AG 3'        |
| <i>Notch1</i>  | 5' CTC ACC TGG TGC AGA CCC AG 3'     | 5' GCA CCT GTA GCT GGT GGC TG 3'        |
| <i>Notch4</i>  | 5' GGT GAC ACC CCT GAT GTC AG 3'     | 5' AGC CTG GCA GCC AGC ATC 3'           |

**Table S2. Antibodies**

| Antigen | Supplier      | Catalogue # |
|---------|---------------|-------------|
| CD31    | Pharmingen    | 553370      |
| DLL4    | R&D Systems   | AF1389      |
| GFP     | Invitrogen    | A-11122     |
| JAG1    | R&D Systems   | AF599       |
| LYVE1   | Abcam         | ab14917     |
| LYVE1   | Ebiosciences  | 14-0443     |
| PROX1   | Angiobio      | 11-002      |
| NOTCH1  | R&D Systems   | AF1057      |
| NOTCH4  | J. Kitajewski | RB2-2       |

## Supplemental Figures

Fig. S1. Quantification of ectopic *Dll4* and *Jag1* transcript levels in HeLa cells. *Dll4* and *Jag1* qRT-PCR of HeLa cell lines used in co-culture (Fig. 3c). Data presented as relative transcript levels  $\pm$  s.e.m.

Fig. S2 Validation of the *Notch4* nullizygous mice. P4 dorsal dermal tissue cross-sections from *Notch4*<sup>-/-</sup> and wild-type littermates were stained for VEGFR3 and either NOTCH4 or NOTCH1. **a)** NOTCH4 expression was absent in the lymphatic endothelium (white arrowheads) and epithelial cells of the hair follicle (yellow arrowheads) and dermis in *Notch4*<sup>-/-</sup> tissues. **b)** NOTCH1 expression was unchanged in the VEGFR3<sup>+</sup> lymphatics (white arrowheads). Scale bar, 50 $\mu$ m.

Fig. S3 Lymphatic branching was unchanged in E14.5 *Notch4*<sup>-/-</sup> dermis. Quantification of the average number of branch-points normalized to unit of vessel length. Data presented  $\pm$  sem. wt (n=7), *N4*<sup>+/-</sup> (n=13), *N4*<sup>-/-</sup> (n=7).

Fig. S4 Dermal blood vasculature was unaffected in *Notch4*<sup>-/-</sup> mice. **a)** CD31 staining of E14.5 dorsal dermal whole-mounts from *N4*<sup>-/-</sup> and control *N4*<sup>+/-</sup> littermates. **b)** Quantification of average CD31 intensity normalized by area. Data presented  $\pm$  s.e.m. *N4*<sup>+/-</sup> (n=3), *N4*<sup>-/-</sup> (n=4). **c)** Quantification of the average number of branch-points per field of view. Data presented  $\pm$  sem. *N4*<sup>+/-</sup> (n=3), *N4*<sup>-/-</sup> (n=5).

Fig. S5 Dermal blood vasculature was unaffected in mice with LEC loss of canonical Notch signaling. *Prox1CreER<sup>T2</sup>* and *DNMAML<sup>f/f</sup>* mice were crossed and tamoxifen administered at E12.5 and dorsal dermis analyzed at E14.5. **a)** CD31 staining of *Prox1CreER<sup>T2</sup>;DNMAML<sup>f/+</sup>* (*DNMAML<sup>LEC</sup>*) mutant and *DNMAML<sup>f/+</sup>* (control) dermis. White dashed line denotes the midline. Scale bars, 1000µm. **b)** Quantification of average CD31 intensity normalized by area. Data presented ± s.e.m. control (n=3), *DNMAML<sup>LEC</sup>* (n=6)

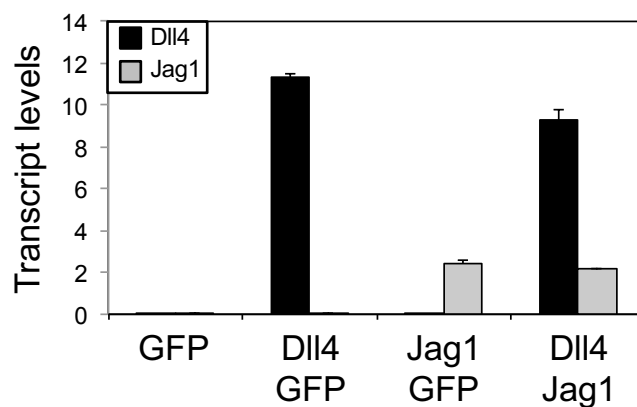

Fig. S1. Quantification of ectopic Dll4 and Jag1 transcript levels in HeLa cells. *Dll4* and *Jag1* qRT-PCR of HeLa cell lines used in co-culture (Fig. 3c). Data presented as relative transcript levels  $\pm$  s.e.m.

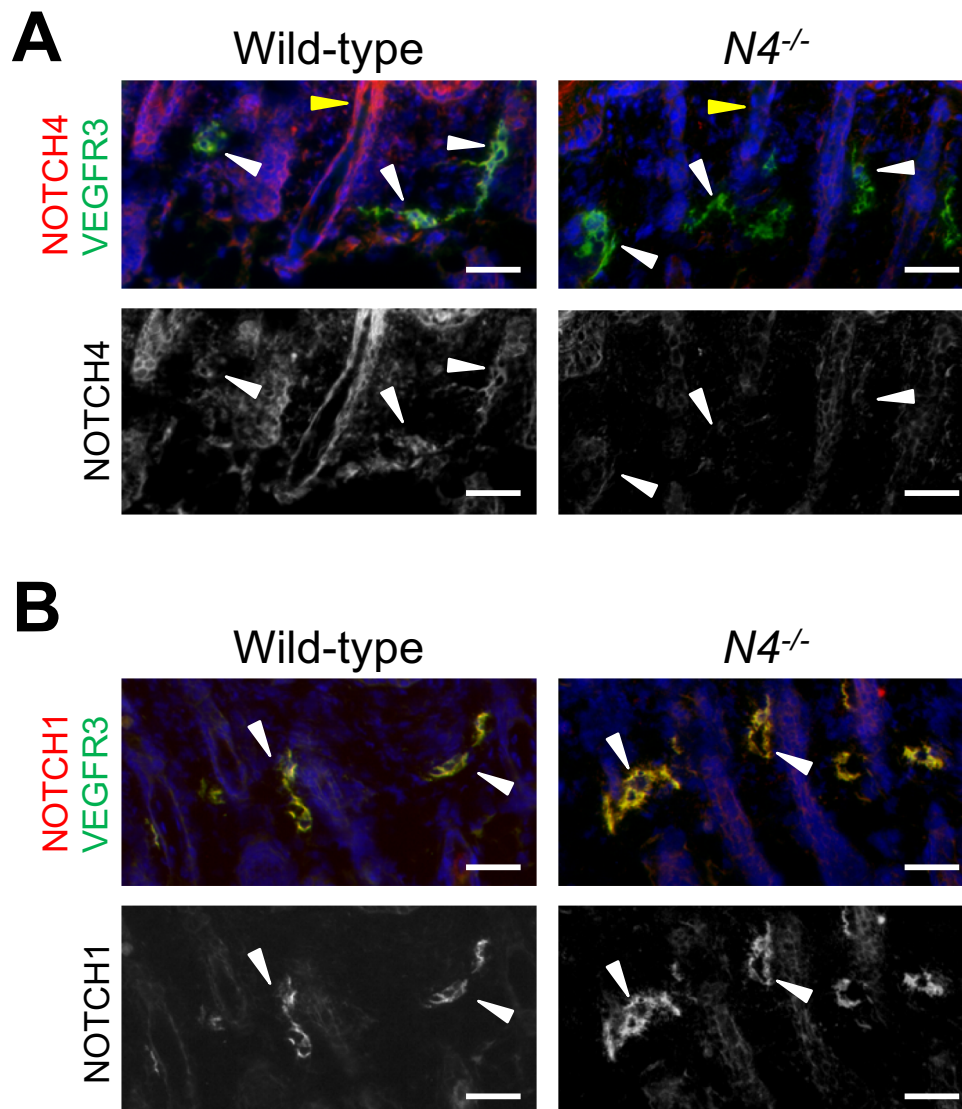

Fig. S2 Validation of the *Notch4* nullizygous mice. P4 dorsal dermal tissue cross-sections from *Notch4*<sup>-/-</sup> and wild-type littermates were stained for VEGFR3 and either NOTCH4 or NOTCH1. **a)** NOTCH4 expression was absent in the lymphatic endothelium (white arrowheads) and epithelial cells of the hair follicle (yellow arrowheads) and dermis in *Notch4*<sup>-/-</sup> tissues. **b)** NOTCH1 expression was unchanged in the VEGFR3<sup>+</sup> lymphatics (white arrowheads). Scale bar, 50µm.

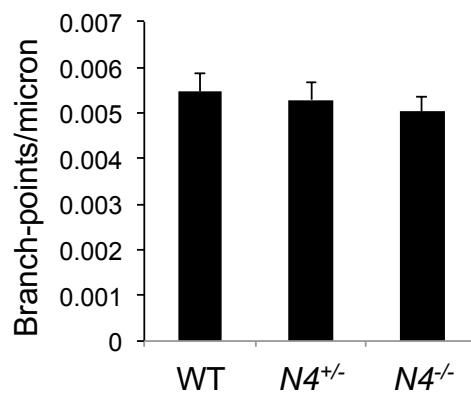

Fig. S3 Lymphatic branching was unchanged in E14.5 *Notch4*<sup>-/-</sup> dermis. Quantification of the average number of branch-points normalized to unit of vessel length. Data presented  $\pm$  sem. wt (n=7), *N4*<sup>+/-</sup> (n=13), *N4*<sup>-/-</sup> (n=7).

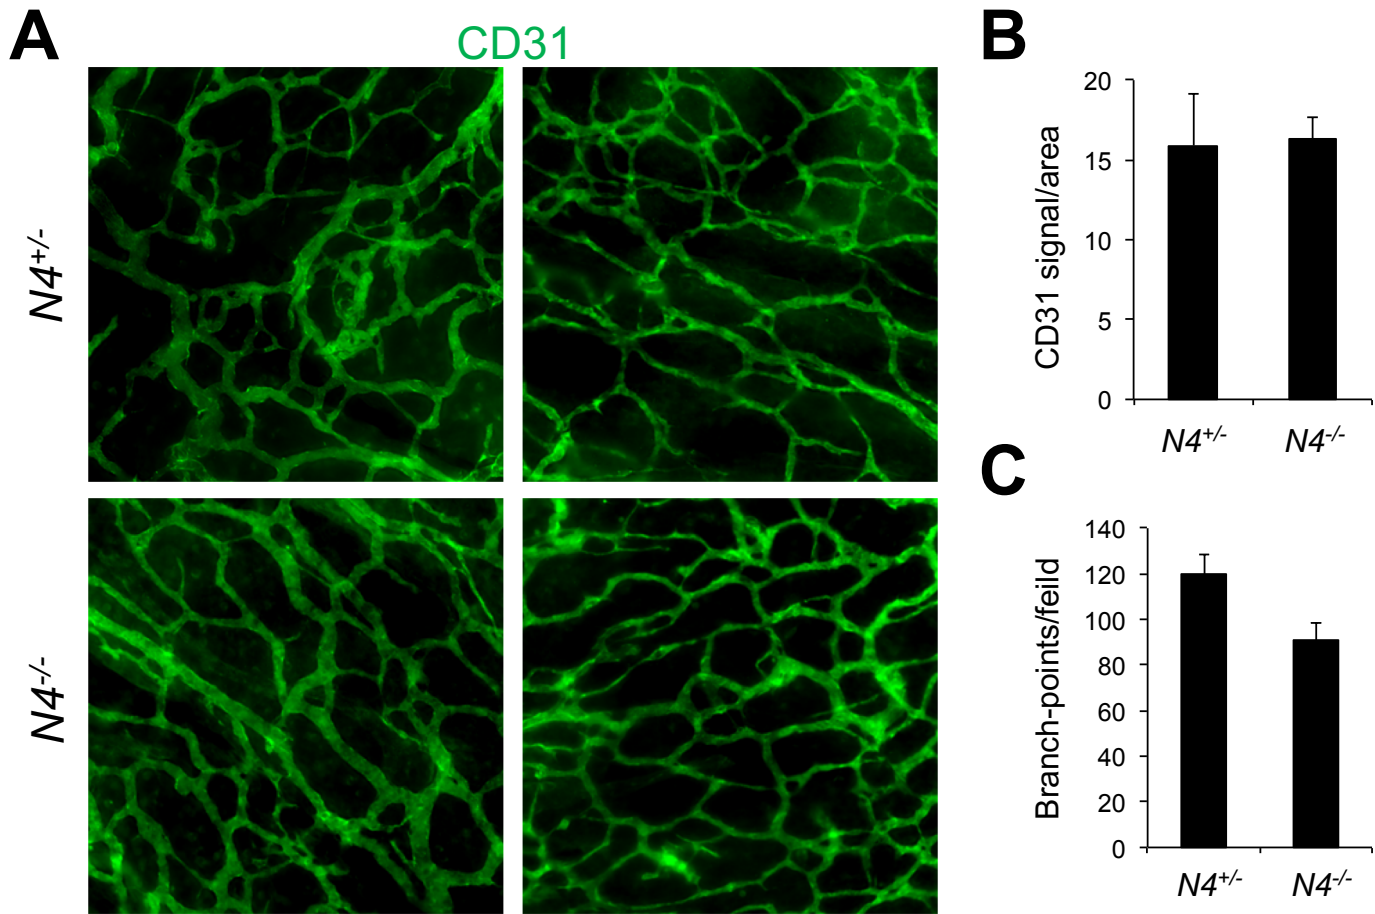

Fig. S4 Dermal blood vasculature was unaffected in *Notch4*<sup>-/-</sup> mice. **a)** CD31 staining of E14.5 dorsal dermal whole-mounts from *N4*<sup>-/-</sup> and control *N4*<sup>+/-</sup> littermates. **b)** Quantification of average CD31 intensity normalized by area. Data presented  $\pm$  s.e.m. *N4*<sup>+/-</sup> (n=3), *N4*<sup>-/-</sup> (n=4). **c)** Quantification of the average number of branch-points per field of view. Data presented  $\pm$  sem. *N4*<sup>+/-</sup> (n=3), *N4*<sup>-/-</sup> (n=5).

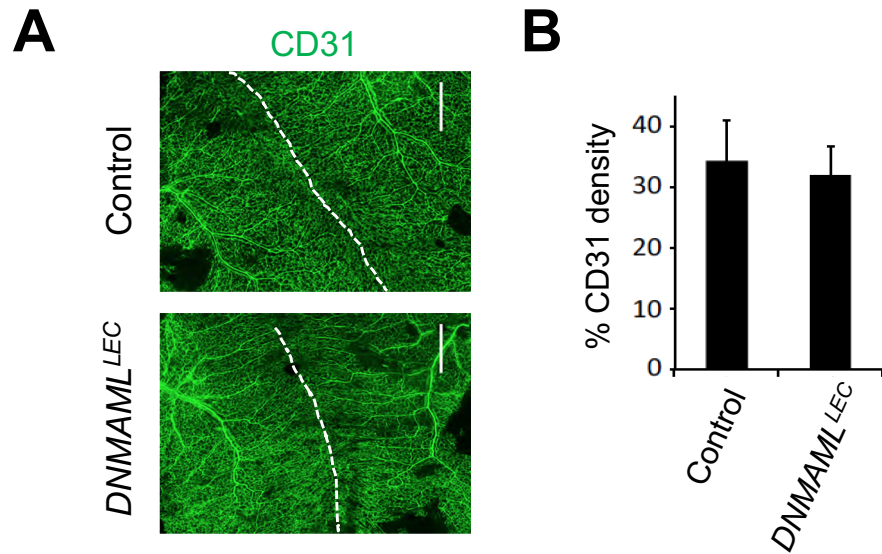

Fig. S5 Dermal blood vasculature was unaffected in mice with LEC loss of canonical Notch signaling. *Prox1CreER<sup>T2</sup>* and *DNMAML<sup>fl/fl</sup>* mice were crossed and tamoxifen administered at E12.5 and dorsal dermis analyzed at E14.5. **a)** CD31 staining of *Prox1CreER<sup>T2</sup>;DNMAML<sup>fl/+</sup>* (*DNMAML<sup>LEC</sup>*) mutant and *DNMAML<sup>fl/+</sup>* (control) dermis. White dashed line denotes the midline. Scale bars, 1000 $\mu$ m. **b)** Quantification of average CD31 intensity normalized by area. Data presented  $\pm$  s.e.m. control (n=3), *DNMAML<sup>LEC</sup>* (n=6).
